# Supplementary material for: A machine learning approach for automated assessment of retinal vasculature in the oxygen induced retinopathy model
Source: PubMed Central journal article supplement (PMC5834630; doi:10.1038/s41598-018-22251-7), 2018-03-02

## Supplementary information

**Title:** A machine learning approach for automated assessment of retinal vasculature in the oxygen induced retinopathy model

**Authors:** Javier Mazzaferri<sup>1</sup>, Bruno Larrivée<sup>1,2</sup>, Bertan Cakir<sup>3</sup>, Przemyslaw Sapieha<sup>1,2,4</sup>, Santiago Costantino<sup>1,2,\*</sup>

1. Research Center of the Maisonneuve-Rosemont Hospital, Montreal, Quebec, Canada
2. Department of Ophthalmology, University of Montreal, Montreal, Quebec, Canada
3. Eye Center, Medical Center, Faculty of Medicine, University of Freiburg, Germany
4. Department of Biochemistry, University of Montreal, Montreal, Quebec, Canada.

\* [santiago.costantino@umontreal.ca](mailto:santiago.costantino@umontreal.ca)

## Supplementary figures

**Fig. S1.** Set of 14 images used for training and evaluation of QuRVA, together with the results of the analysis, in the format generated by our software. Left panel: Tufts segmentation in gray shades on top of the original image displayed in shades of cyan. The silhouette of the analyzed region is delimited in magenta. Central panel: Original image. Right panel: Segmented vasculature skeleton (red), branching points (yellow), and avascular zones (blue).

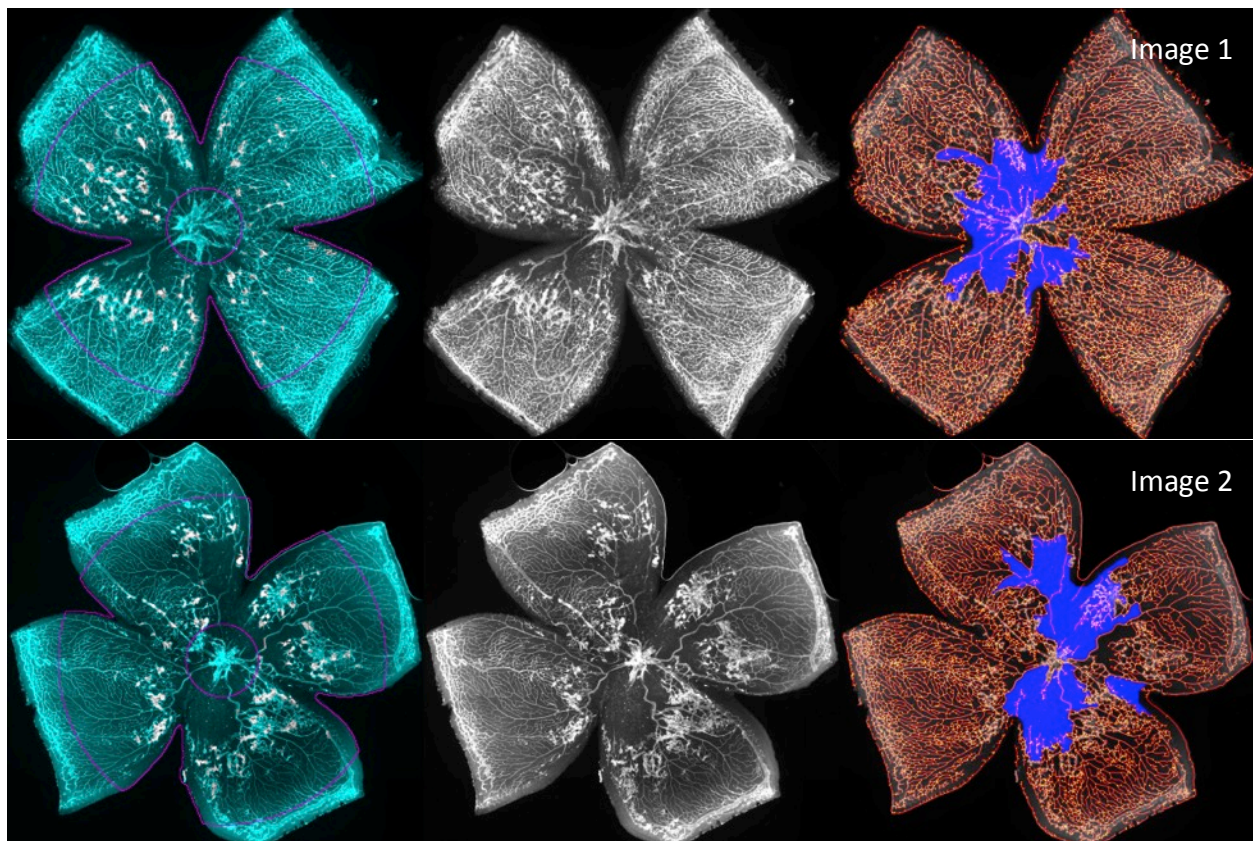

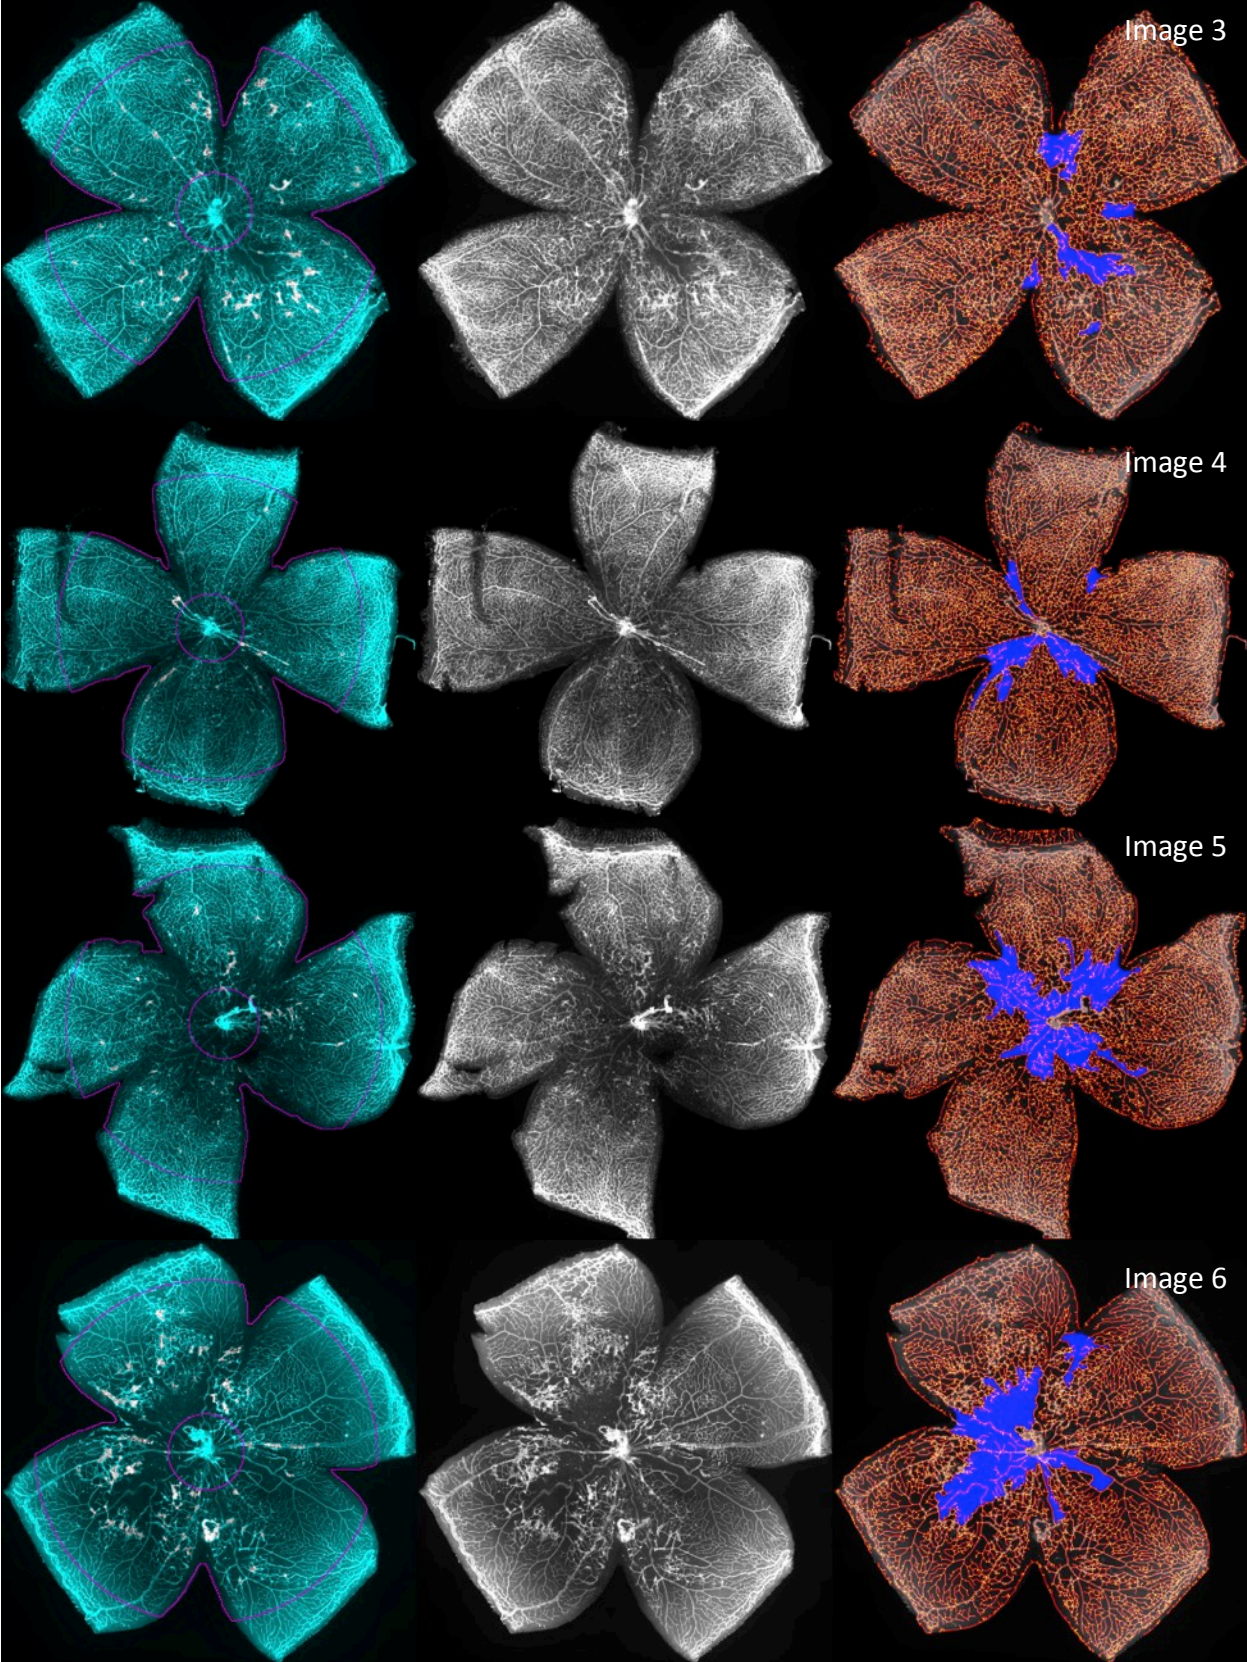

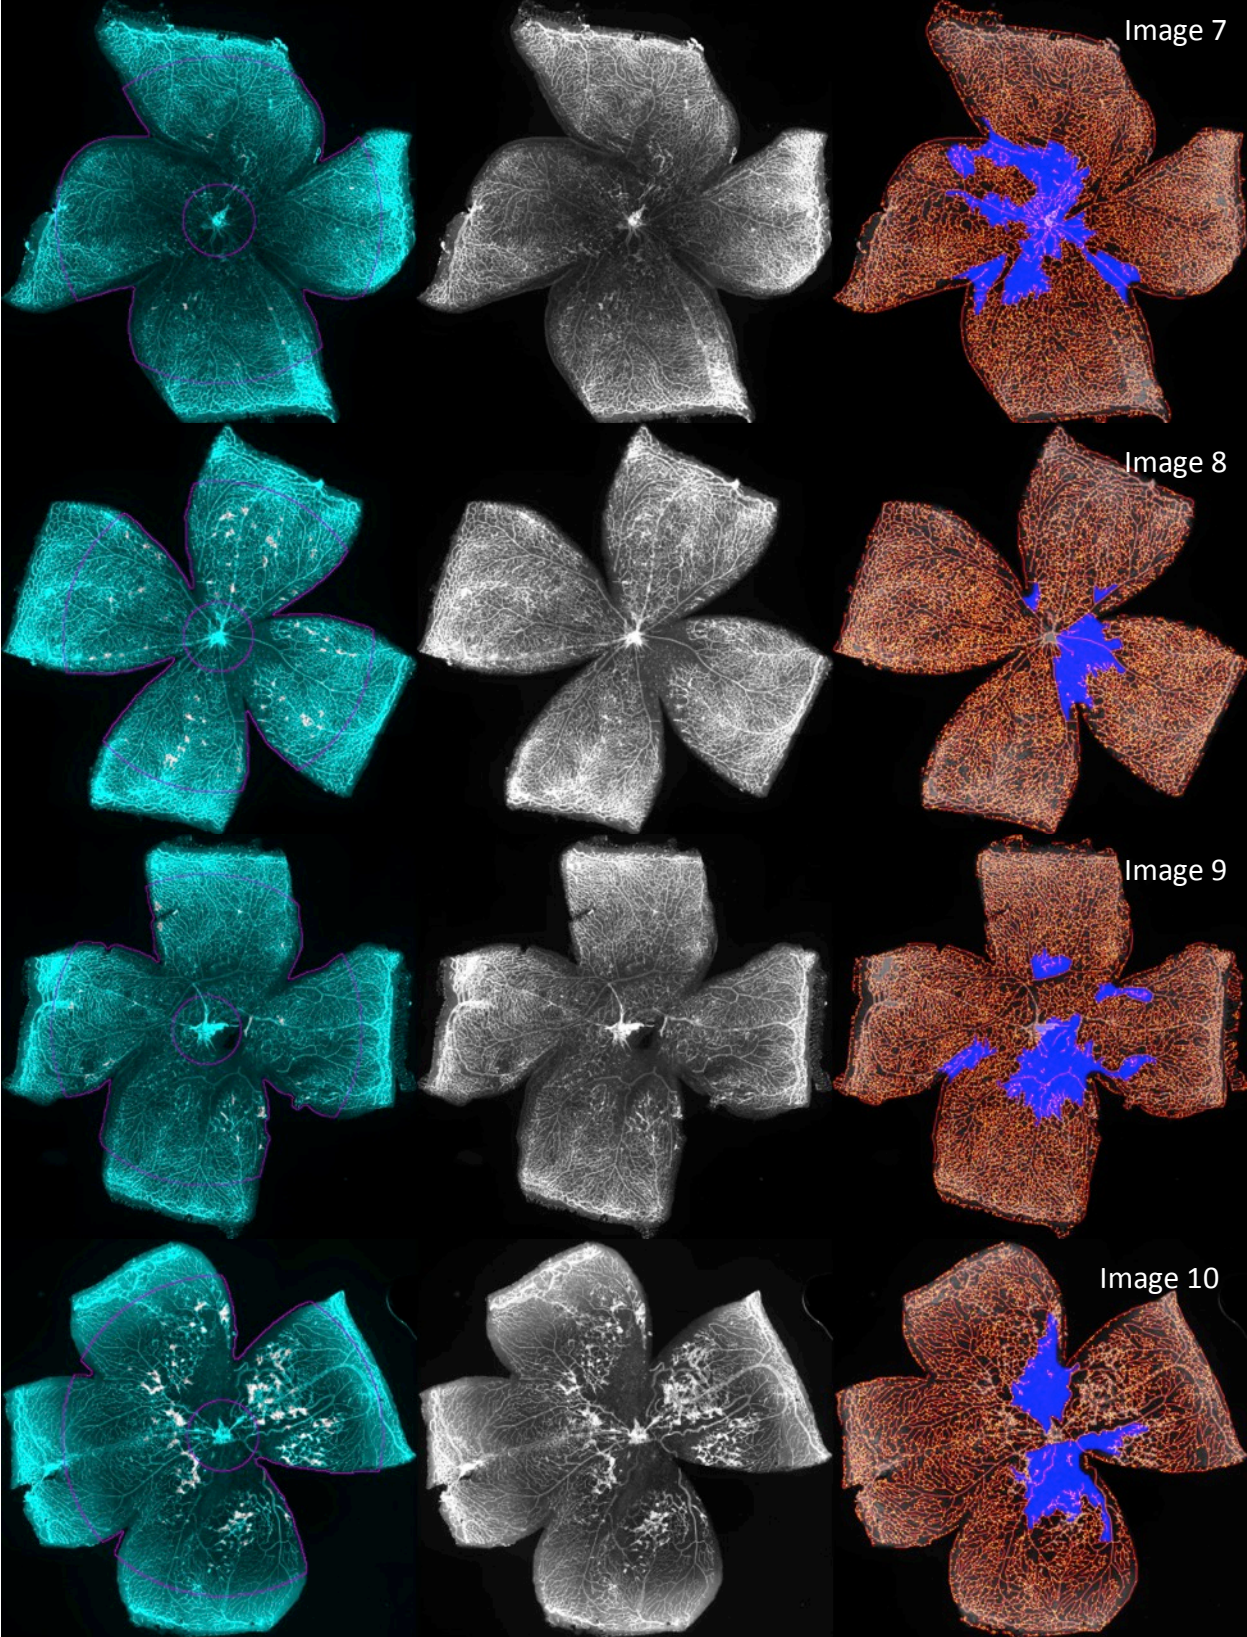

Image 7

Image 8

Image 9

Image 10

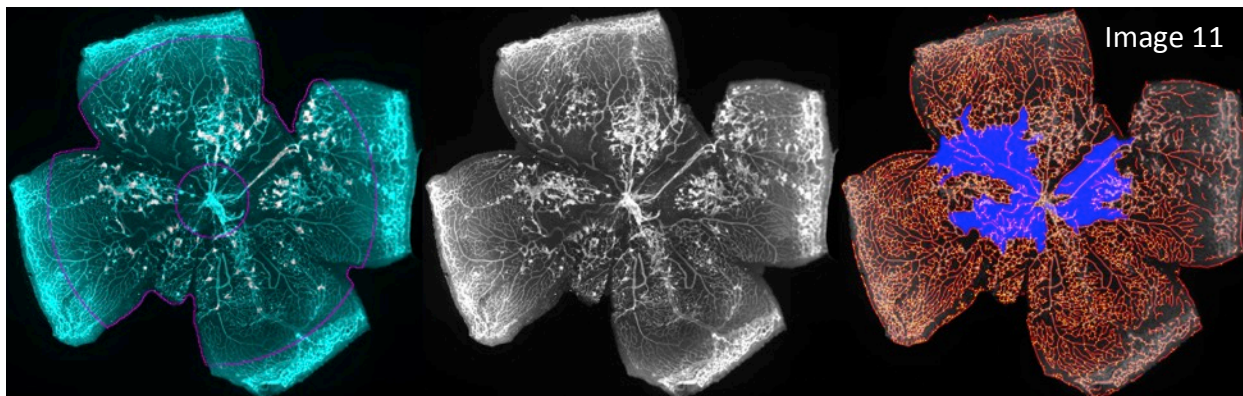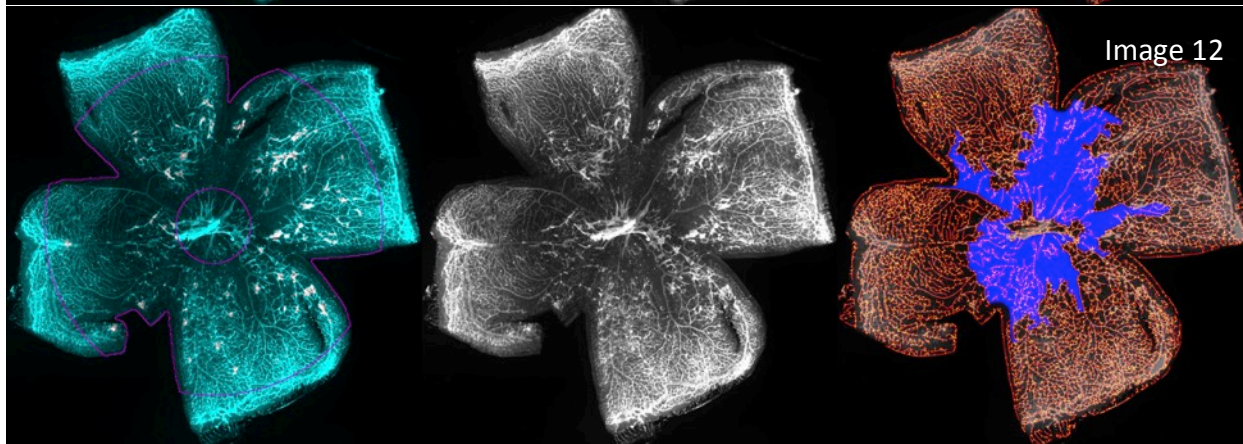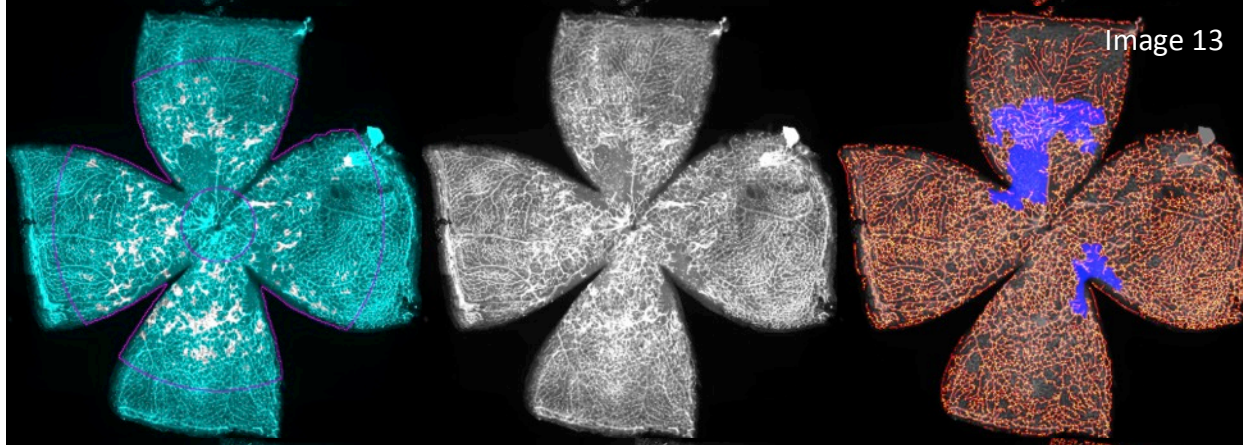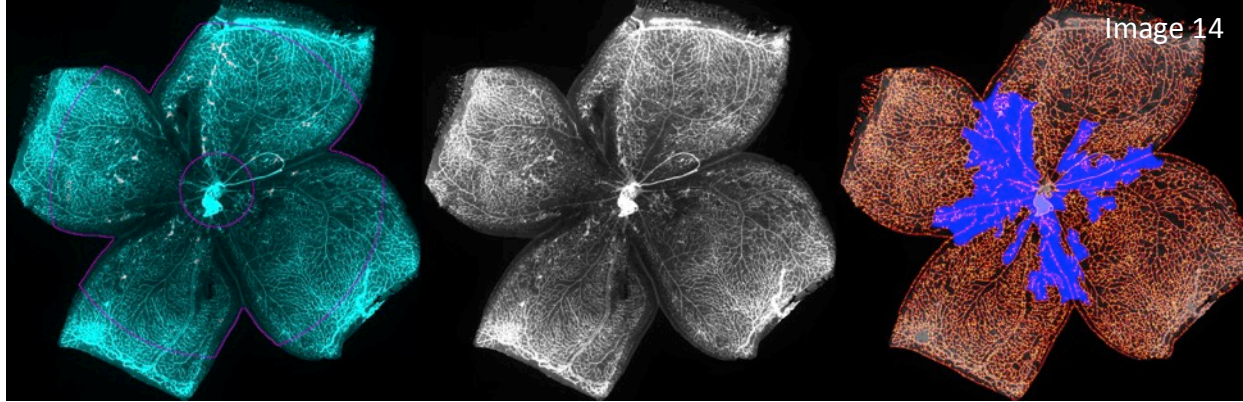

Supplement: 41598_2018_22251_MOESM1_ESM.pdf [file 41598_2018_22251_MOESM1_ESM.pdf]
